# Supplementary material for: Uncovering the rupture mechanism of carbon nanotube filled cis-1,4-polybutadiene via molecular dynamics simulation
Source: Royal Society of Chemistry journal article supplement (doi:10.1039/c8ra04469d), 2018-01-01
Supplement: c8ra04469d1.pdf [file c8ra04469d1.pdf]

## Supporting Information

### **Uncovering the rupture mechanism of carbon nanotube filled cis-1,4-polybutadiene via molecular dynamics simulation**

Xiuying Zhao<sup>1</sup>, Tiantian Li<sup>1</sup>, Lan Huang<sup>3</sup>, Bin Li<sup>4</sup>, Jun Liu<sup>1</sup>, Yangyang Gao<sup>1,2\*</sup>, Liqun Zhang<sup>1,2\*</sup>

<sup>1</sup>Key Laboratory of Beijing City on Preparation and Processing of Novel Polymer Materials, Beijing University of Chemical Technology, 10029, People's Republic of China

<sup>2</sup>State Key Laboratory of Organic-Inorganic Composites, Beijing University of Chemical Technology, 10029, People's Republic of China

<sup>3</sup>Department of Materials Science and Engineering, Texas A&M University, College Station, Texas 77843-3003, USA

<sup>4</sup>CAS Key Laboratory of Nanosystem and Hierarchical Fabrication, CAS Center for Excellence in Nanoscience, National Center for Nanoscience and Technology, Beijing 100190, P.R. China

---

\* Corresponding author: [zhanglq@mail.buct.edu.cn](mailto:zhanglq@mail.buct.edu.cn) or [gaoyy@mail.buct.edu.cn](mailto:gaoyy@mail.buct.edu.cn)

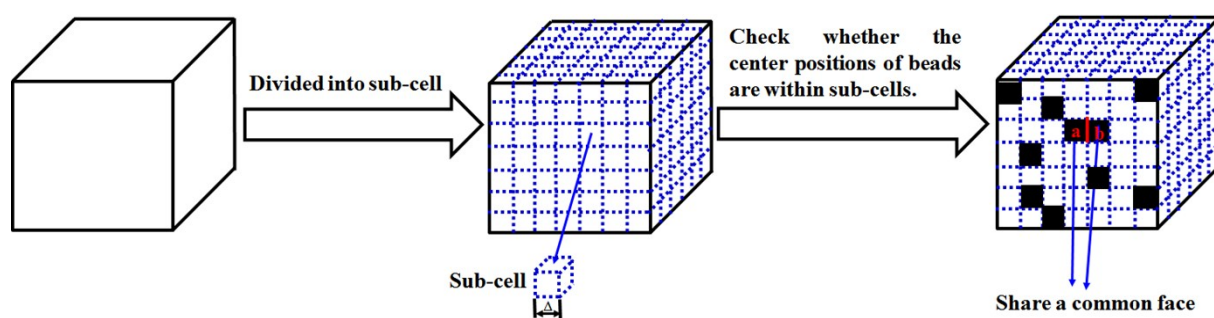

**Fig. S1** Illustration of the method on defining the number and positions of voids. It is noted that the black sub-cell stands for the unoccupied sub-cell (void). In addition, the unoccupied sub-cells can appear within the inner box. For convenient, the unoccupied sub-cells on the surface of box are used as examples. The sub-cells (a) and (b) share a common face (denoted by the red line), which belong to the same void.

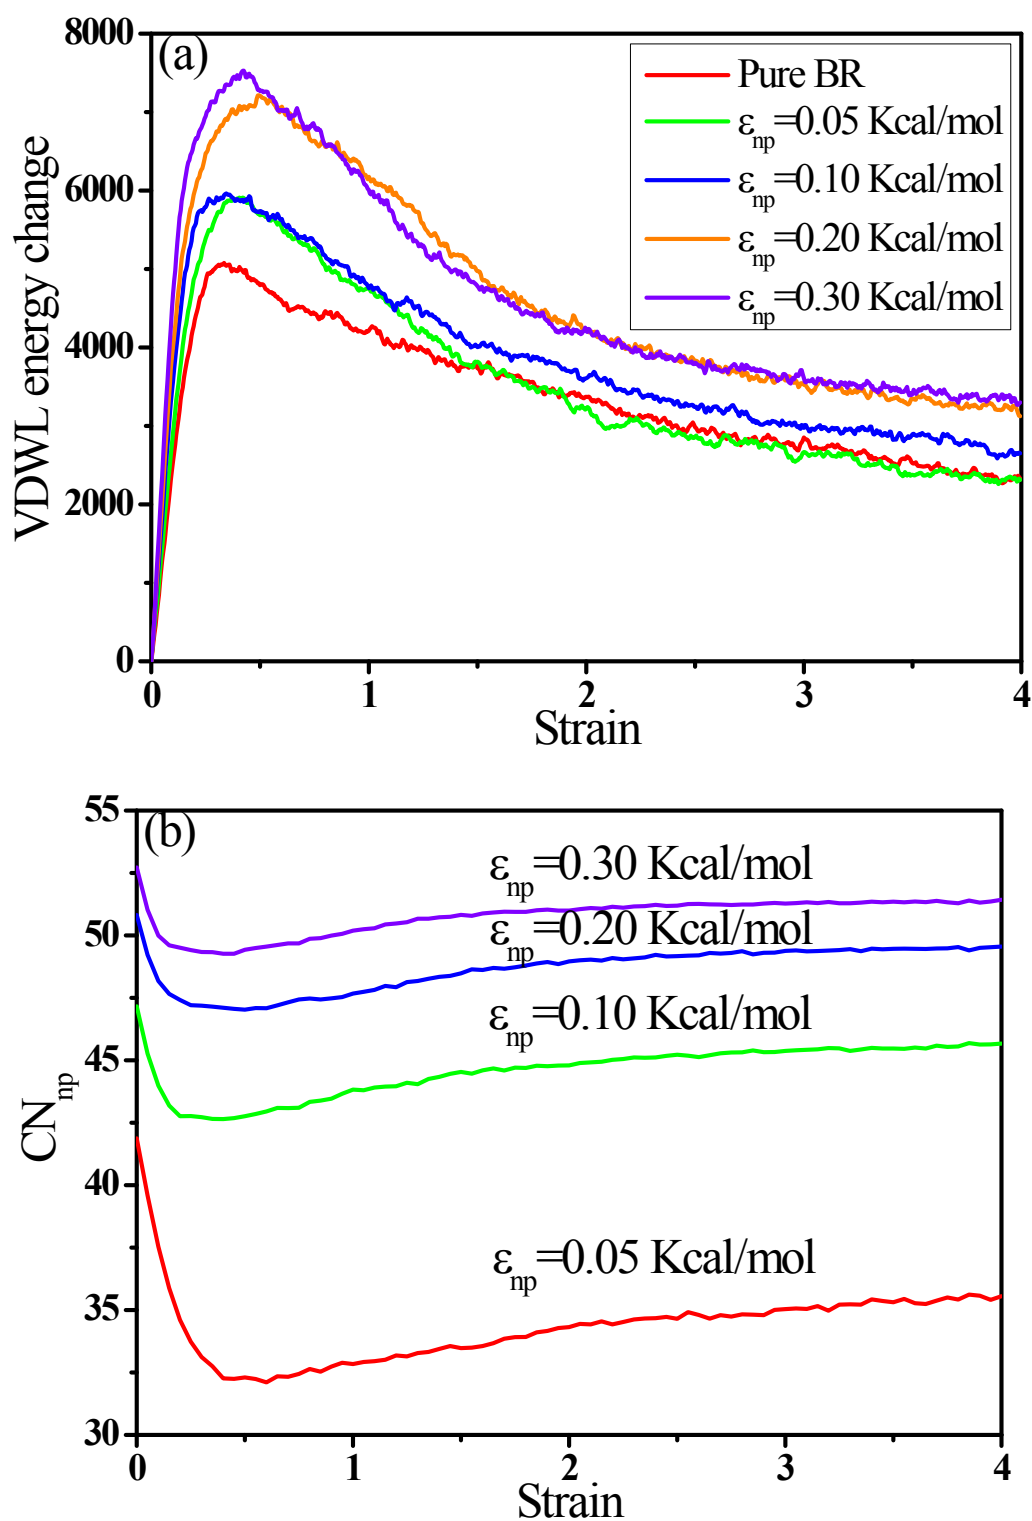

Fig. S2 (a) VDWL energy change and (b) the average number of neighbor polybutadiene beads per carbon nanotube (CNT) bead ( $CN_{np}$ ) with respect to the strain for pure system and the CNT filled systems with different interactions  $\epsilon_{np}$ .

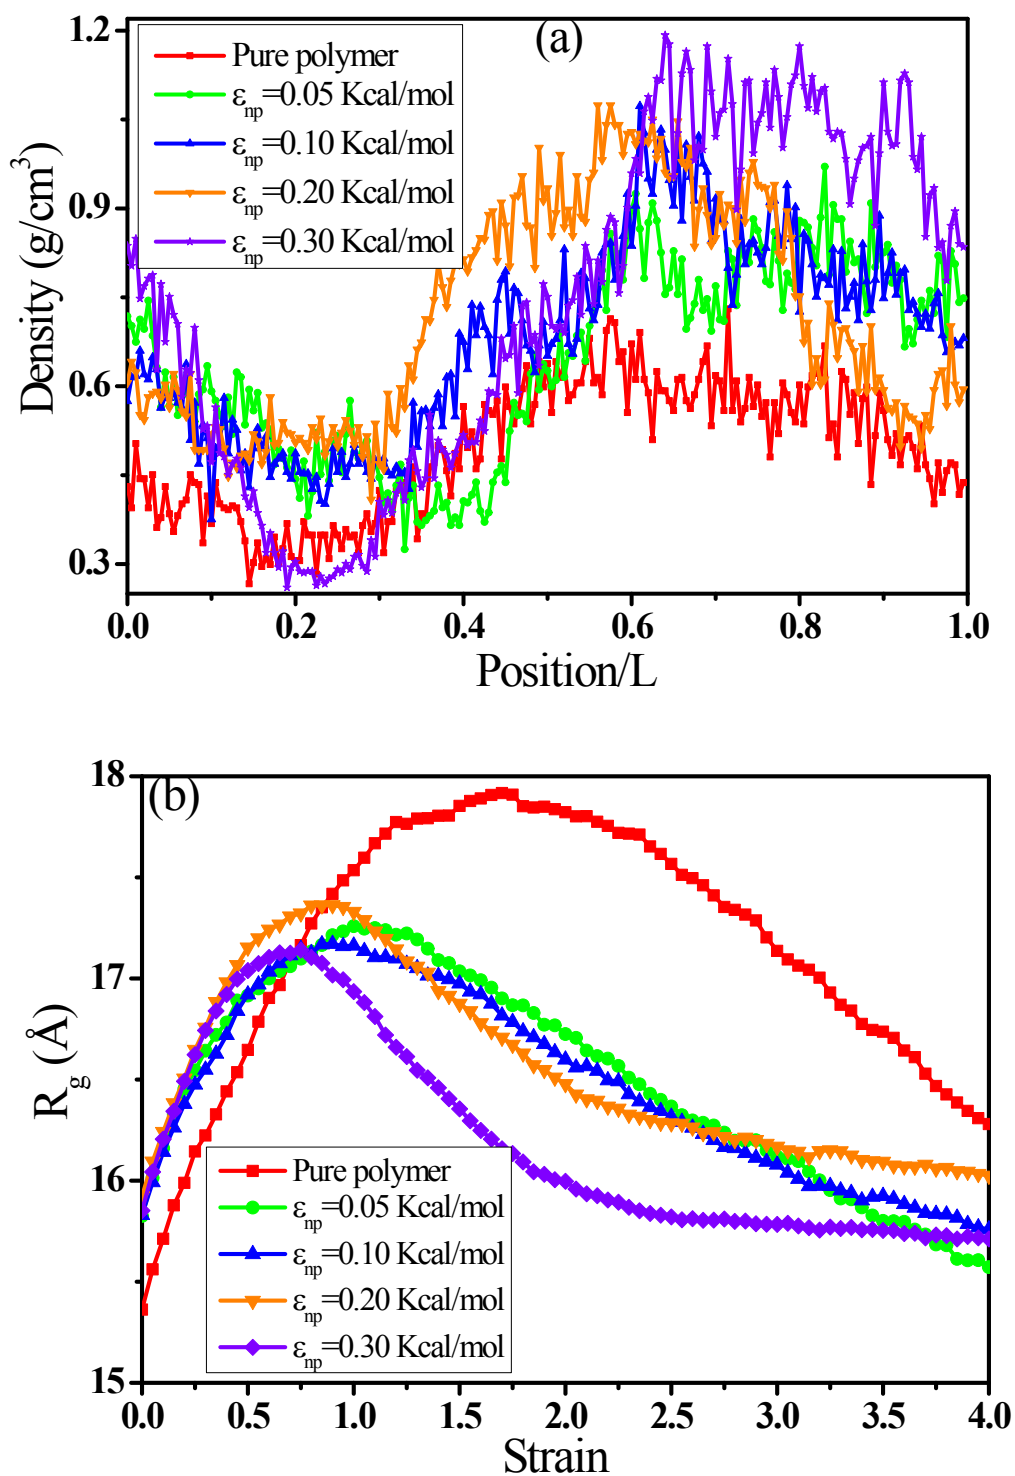

Fig. S3 (a) Density distribution of all polybutadiene beads along the tensile direction ( $L$  is the length of box along the tensile direction) at strain=0.5. (b) The root mean squared radius of gyration of chains  $R_g$  with respect to the strain for pure system and the CNT filled systems with different interactions  $\epsilon_{np}$ .

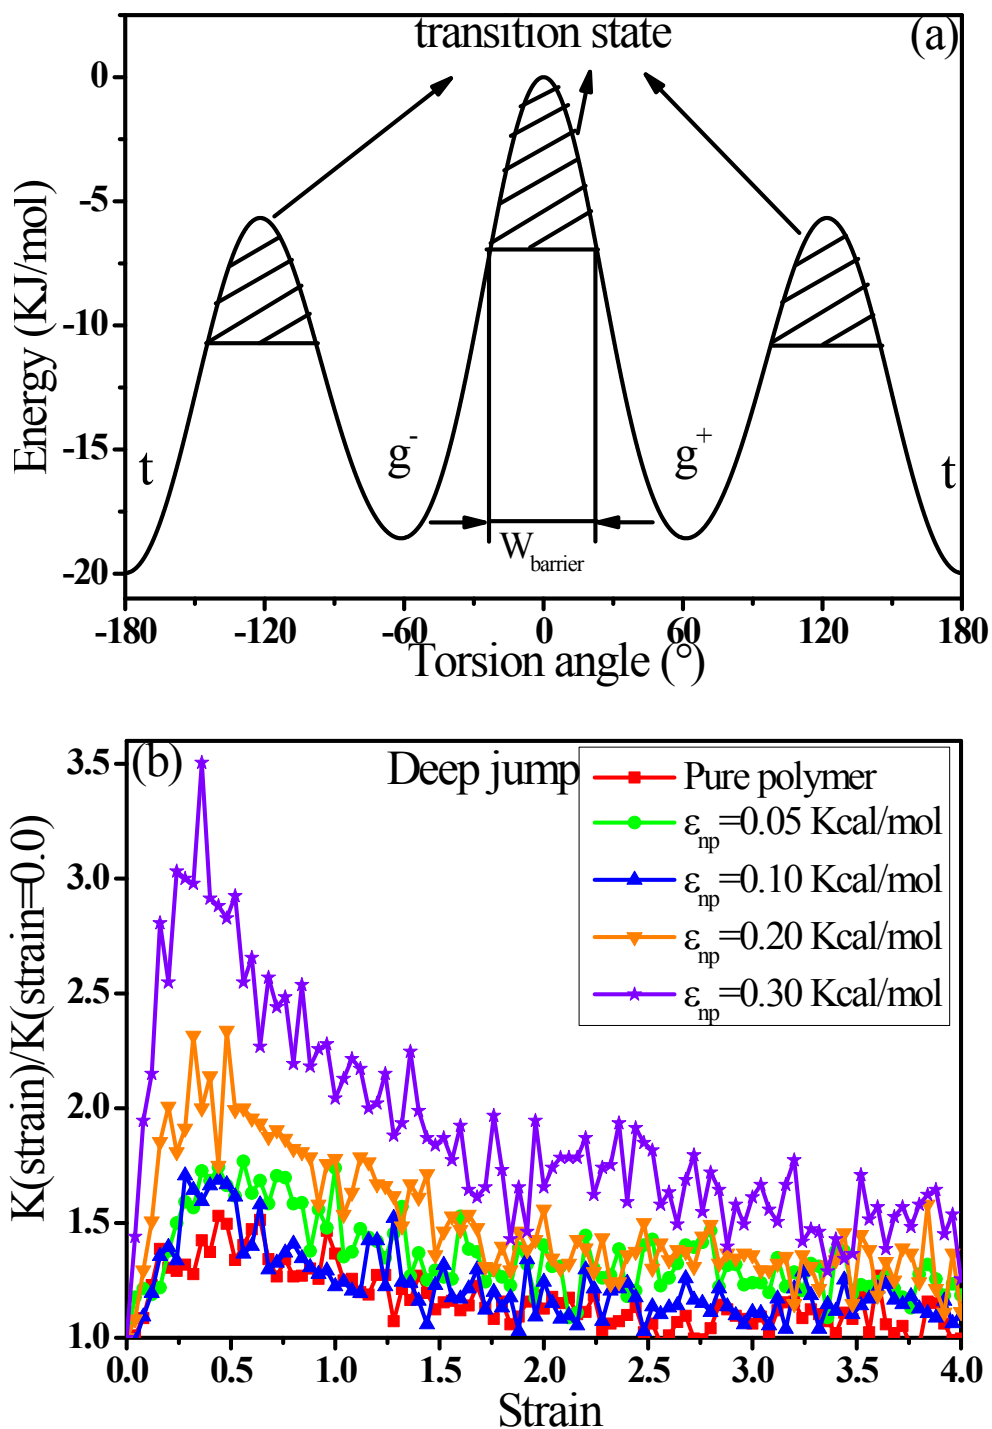

Fig. S4 (a) The illustration of the transition state and the conformational state for the torsion angle  $\varphi_3$ . Minimum of the energy curve is one of the  $t$ ,  $g^{+}$ , and  $g^{-}$  conformational state.  $W_{\text{barrier}}$  is the width of the barrier. (b) The ratio of the conformational transition rate at some strain to that at the strain=0.0  $K(\text{strain})/K(\text{strain}=0.0)$  for the deep jump with respect to the strain.

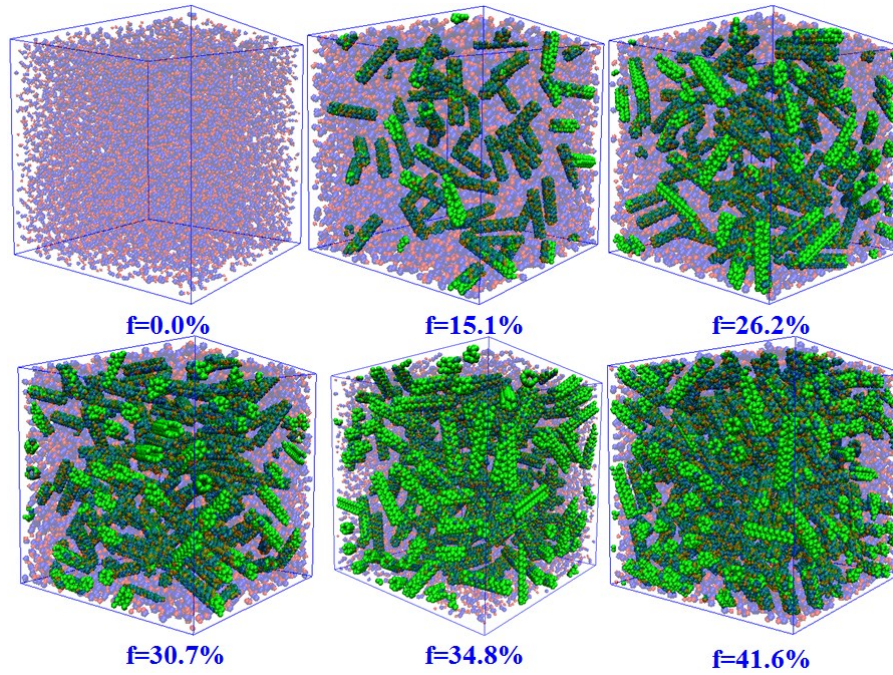

Fig. S5 (a) United atom models for cis-1,4-polybutadiene (PB); (b) Snapshots of pure system and the carbon nanotube (CNT) filled systems with different mass fractions of CNTs ( $f$ ). The blue and red beads denote the PB chains, while the green beads denote the CNTs.

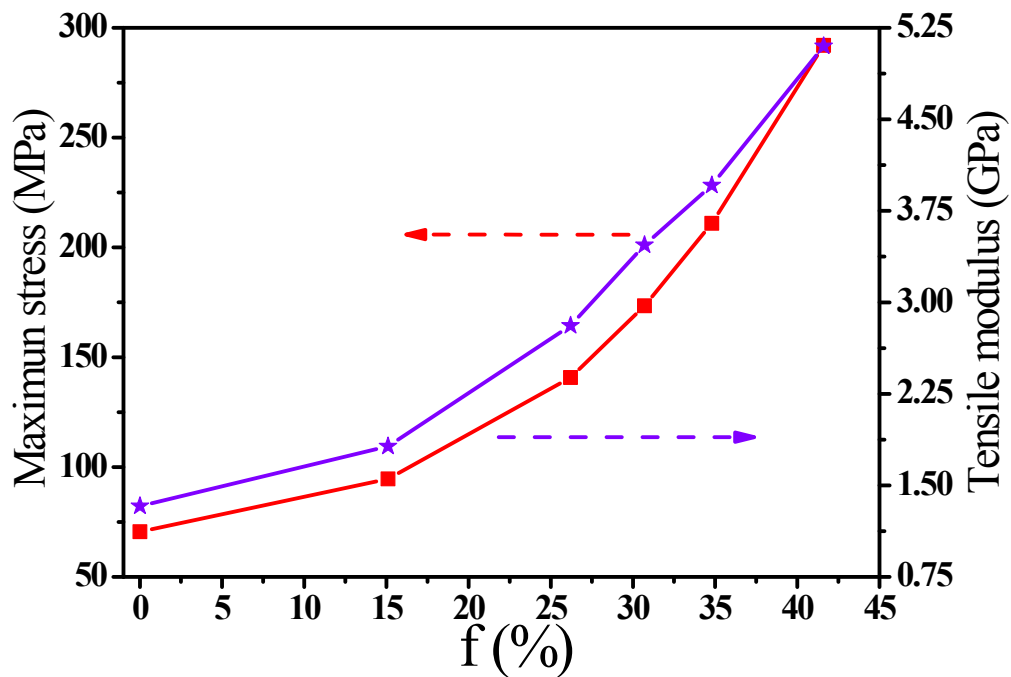

Fig. S6 The left axis denotes the maximum stress, while the right axis represents the tensile modulus with respect to the mass fraction of carbon nanotube ( $f$ ).

Table SI The force-field parameters for the carbon nanotube filled polybutadiene model

| (a)                                     |                                                   |                                         |                                    |                                    |                                    |                                    |
|-----------------------------------------|---------------------------------------------------|-----------------------------------------|------------------------------------|------------------------------------|------------------------------------|------------------------------------|
| Bond stretching                         | $k_b$ (Kcal·(mol·Å <sup>2</sup> ) <sup>-1</sup> ) |                                         |                                    | $r_0$ (Å)                          |                                    |                                    |
| CH <sub>2</sub> -CH <sub>2</sub>        | 331.5                                             |                                         |                                    | 1.54                               |                                    |                                    |
| CH <sub>2</sub> -CH                     | 384.5                                             |                                         |                                    | 1.50                               |                                    |                                    |
| CH=CH                                   | 516.5                                             |                                         |                                    | 1.34                               |                                    |                                    |
| (b)                                     |                                                   |                                         |                                    |                                    |                                    |                                    |
| Bond angle bending                      | $k_\theta$ (Kcal·mol <sup>-1</sup> )              |                                         |                                    | $\theta_0$ (deg)                   |                                    |                                    |
| CH <sub>2</sub> -CH <sub>2</sub> -CH    | 57.5                                              |                                         |                                    | 111.65                             |                                    |                                    |
| CH <sub>2</sub> -CH-CH                  | 44.7                                              |                                         |                                    | 125.89                             |                                    |                                    |
| (c)                                     |                                                   |                                         |                                    |                                    |                                    |                                    |
| Torsion                                 | $k_1$<br>(Kcal·mol <sup>-1</sup> )                | $k_2$<br>(Kcal·mol <sup>-1</sup> )      | $k_3$<br>(Kcal·mol <sup>-1</sup> ) | $k_4$<br>(Kcal·mol <sup>-1</sup> ) | $k_5$<br>(Kcal·mol <sup>-1</sup> ) | $k_6$<br>(Kcal·mol <sup>-1</sup> ) |
| CH <sub>2</sub> -CH=CH-CH <sub>2</sub>  | -                                                 | 12.1                                    | -                                  | -                                  | -                                  | -                                  |
| $\varphi_1$                             | -                                                 | 12.1                                    | -                                  | -                                  | -                                  | -                                  |
| CH <sub>2</sub> -CH <sub>2</sub> -CH=CH | 0.5165                                            | -0.236                                  | 0.2777                             | 0.1315                             | 0.173                              | 0.082                              |
| $\varphi_2$                             | 0.5165                                            | -0.236                                  | 0.2777                             | 0.1315                             | 0.173                              | 0.082                              |
| CH-CH <sub>2</sub> -CH <sub>2</sub> -CH | -0.444                                            | 0.3095                                  | -1.8195                            | -0.033                             | -0.1235                            | -0.095                             |
| $\varphi_3$                             | -0.444                                            | 0.3095                                  | -1.8195                            | -0.033                             | -0.1235                            | -0.095                             |
| (d)                                     |                                                   |                                         |                                    |                                    |                                    |                                    |
| Non-bonding                             |                                                   | $\varepsilon$ (Kcal·mol <sup>-1</sup> ) | $\sigma$ (Å)                       | $r_{\text{cutoff}}$ (Å)            |                                    |                                    |
| CH <sub>2</sub>                         | CH <sub>2</sub>                                   | 0.0936                                  | 4.009                              | 10.023                             |                                    |                                    |
| CH <sub>2</sub>                         | CH                                                | 0.1015                                  | 3.793                              | 9.483                              |                                    |                                    |
| CH                                      | CH                                                | 0.1000                                  | 3.385                              | 8.463                              |                                    |                                    |
| CNT                                     | CH <sub>2</sub>                                   | 0.05-0.3                                | 3.385                              | 8.463                              |                                    |                                    |
| CNT                                     | CH                                                | 0.05-0.3                                | 3.385                              | 8.463                              |                                    |                                    |
| CNT                                     | CNT                                               | 0.1000                                  | 3.385                              | 3.791                              |                                    |                                    |
